# Supplementary material for: Trends in Rates of Infections Requiring Hospitalization Among Adults With Versus Without Diabetes in the U.S., 2000–2015
Source: Oxford University Press journal article supplement (doi:10.2337/dc19-0653), 2019-10-15
Supplement: dc190653supplementarydata.pdf [file dc190653supplementarydata.pdf]

SUPPLEMENTARY DATA

**Supplementary Table 1. ICD-9-CM classifications of hospitalizations with select infections**

| Category                        | Infection                                   | ICD-9-CM                             |                                                 |
|---------------------------------|---------------------------------------------|--------------------------------------|-------------------------------------------------|
| Any infection*                  | All codes below combined (excluding sepsis) |                                      |                                                 |
| Respiratory tract infection     | Pneumonia                                   | 480-486                              |                                                 |
|                                 | Influenza                                   | 487-488                              |                                                 |
|                                 | Acute bronchitis and bronchiolitis          | 466.0, 466.1                         |                                                 |
| Kidney Infections               | Pyelonephritis and perinephric abscess      | 590                                  |                                                 |
| Skin and soft tissue infections | Cellulitis                                  | 681-682                              |                                                 |
|                                 | Foot infections                             | Gangrene                             | 040.0, 440.24, 785.4<br>730.07, 730.17, 730.27, |
|                                 |                                             | Osteomyelitis of ankle and foot      | 730.97                                          |
|                                 |                                             | Foot ulcer                           | 440.23, 707.14, 707.15, 707.1                   |
|                                 |                                             | Cellulitis or abscess of foot or toe | 680.7, 682.7, 681.10, 681.11                    |
|                                 |                                             | Osteomyelitis                        | 730.0, 730.1, 730.2, 730.9                      |
| Mycoses                         |                                             | 110-118.x                            |                                                 |
| Postoperative wound infections  |                                             | 998.51, 998.59                       |                                                 |
| Sepsis                          |                                             | 038.0-038.9, 995.91, 995.92          |                                                 |

\*Any infection is estimated as the number of hospitalizations that include any of the codes mentioned in Table 1, excluding sepsis.

Note: Categories are not mutually exclusive. For example, one hospitalization could have listed both a kidney infection and pneumonia, and this hospitalization will be counted in both pneumonia and kidney rates.

SUPPLEMENTARY DATA

**Supplementary Table2.** ICD-9-CM codes for comorbidities associated with infection-related hospitalizations

| <i>Comorbidities</i>                                                               | <i>ICD-9-CM</i>                                                                                               |
|------------------------------------------------------------------------------------|---------------------------------------------------------------------------------------------------------------|
| Myocardial infarction                                                              | 410.x, 412.x                                                                                                  |
| Congestive heart failure                                                           | 398.91, 402.01, 402.11, 402.91, 404.01, 404.03, 404.11, 404.13, 404.91, 404.93, 425.4-425.9, 428.x            |
| Peripheral vascular disease                                                        | 093.0, 437.3, 440.X, 441.X, 443.1-443.9, 557.1 , 557.9, 785.4, V43.4, procedure 38.48                         |
| Cerebrovascular disease                                                            | 362.34, 430.x-438.x                                                                                           |
| Dementia                                                                           | 290.x, 294.1, 331.2                                                                                           |
| Chronic pulmonary disease                                                          | 416.8, 416.9, 490.x-505.x, 506.4, 508.1, 508.8                                                                |
| Peptic ulcer disease                                                               | 531.x-534.x                                                                                                   |
| Rheumatic disease                                                                  | 446.5, 710.0-710.4, 714.0-714.2, 714.8, 725.x                                                                 |
| Mild liver disease                                                                 | 070.22, 070.23, 070.32, 070.33, 070.44, 070.54, 070.6, 070.9, 570.X, 571.X, 573.3, 573.4, 573.8, 573.9, V42.7 |
| Hypertension                                                                       | 401.x                                                                                                         |
| Hemiplegia or paraplegia                                                           | 344.1, 342.x                                                                                                  |
| Renal disease                                                                      | 582.x, 583-583.7, 585.x, 586.x, 588.x                                                                         |
| Any malignancy, including lymphoma and leukemia, except malignant neoplasm of skin | 140.1-172.x, 174.x-195.8, 200.x-208.x, 238.6                                                                  |
| Moderate or severe liver disease                                                   | 456.0-456.2, 572.2-572.8                                                                                      |
| Metastatic solid tumor                                                             | 196.x-199.x                                                                                                   |
| HIV/AIDS                                                                           | 042.x-044.x                                                                                                   |

SUPPLEMENTARY DATA

**Supplementary Table 3.** Time-stratified characteristics of patients with an infection-related hospitalization, by diabetes status, in the United States 2000—2015

|                                         | Diabetes | Proportion (95%CI) <sup>a</sup> |                  |                  |                  | Trend 1 <sup>b</sup> |          | Trend 2 <sup>b</sup> |          |
|-----------------------------------------|----------|---------------------------------|------------------|------------------|------------------|----------------------|----------|----------------------|----------|
|                                         |          | 2000                            | 2005             | 2010             | 2015             | Year                 | Δ%/year* | Year                 | Δ%/year* |
| <i>Characteristics</i>                  |          |                                 |                  |                  |                  |                      |          |                      |          |
| Gender (men)                            | no       | 45.5 (45.5-46.2)                | 46 (45.6-46.4)   | 46.8 (46.4-47.2) | 47.4 (47.2-47.6) | 2000-2015            | 0.3*     | n/a                  |          |
|                                         | yes      | 48.2 (47.8-48.7)                | 48.7 (48.4-49.1) | 50.3 (49.9-50.6) | 52.0 (51.8-52.2) | 2000-2009            | 0.4*     | 2009-2015            | 0.8*     |
| Age (years), mean                       | no       | 64.3 (63.8-64.8)                | 63.7 (63.2-64.2) | 62.7 (62.2-63.2) | 63.3 (63.1-63.5) | 2000-2015            | -0.1*    | n/a                  |          |
|                                         | yes      | 66.3 (66.0-66.6)                | 65.8 (65.5-66.1) | 65.4 (65.1-65.7) | 65.6 (65.4-65.7) | 2000-2015            | -0.1*    | n/a                  |          |
| Hospitalization duration (days), median | no       | 5 (3-9)                         | 5 (3-9)          | 5 (3-9)          | 5 (3-8)          | NA                   |          |                      |          |
|                                         | yes      | 6 (3-10)                        | 5 (3-9)          | 5 (3-8)          | 5 (3-8)          | NA                   |          |                      |          |
| <i>Comorbidities</i>                    |          |                                 |                  |                  |                  |                      |          |                      |          |
| Hypertension                            | no       | 25.9 (25.5-26.4)                | 32.0 (31.5-32.6) | 34.0 (33.4-34.5) | 35.4 (35.2-35.7) | 2000-2004            | 5.3*     | 2004-2015            | 1.1*     |
|                                         | yes      | 39.4 (38.9-40)                  | 47.6 (47.1-48.2) | 45.6 (45.1-46.2) | 43.9 (43.7-44.2) | 2000-2004            | 4.6*     | 2004-2015            | -0.5*    |
| Myocardial Infarction                   | no       | 5.7 (5.5-6)                     | 6.0 (5.8-6.3)    | 6.4 (6.2-6.6)    | 6.2 (6.1-6.3)    | 2000-2011            | 1.1*     | 2011-2015            | -1.7*    |
|                                         | yes      | 8.2 (7.8-8.6)                   | 8.2 (7.8-8.6)    | 8.6 (8.3-9.0)    | 7.9 (7.8-8.1)    | 2000-2012            | 0.5*     | 2012-2015            | -3.6*    |
| Congestive Heart Failure                | no       | 21.4 (20.9-21.9)                | 22.9 (22.4-23.5) | 20.5 (20.0-21.0) | 22.5 (22.3-22.8) | 2000-2012            | -0.6     | 2012-2015            | 2.3      |
|                                         | yes      | 30.8 (30.2-31.4)                | 31.5 (30.9-32.1) | 29.1 (28.5-29.7) | 30.7 (30.4-31.0) | 2000-2012            | -0.7*    | 2012-2015            | 1.3      |
| Peripheral Vascular Disease             | no       | 6.9 (6.7-7.1)                   | 6.9 (6.6-7.3)    | 7.4 (7.1-7.6)    | 7.5 (7.3-7.7)    | 2000-2015            | 0.6*     | n/a                  |          |
|                                         | yes      | 21.9 (21.4-22.4)                | 18.0 (17.5-18.6) | 16.9 (16.4-17.4) | 16.8 (16.5-17.1) | 2000-2006            | -3.6*    | 2006-2015            | -0.7*    |
| Cerebrovascular disease                 | no       | 5.5 (5.3-5.7)                   | 4.6 (4.5-4.8)    | 5.2 (5.1-5.4)    | 5 (4.9-5)        | 2000-2015            | -0.2     | n/a                  |          |
|                                         | yes      | 7.0 (6.7-7.3)                   | 5.6 (5.4-5.8)    | 6.2 (6-6.4)      | 5.6 (5.5-5.8)    | 2000-2015            | -0.9*    | n/a                  |          |
| Dementia                                | no       | 3.8 (3.6-4)                     | 3.5 (3.3-3.7)    | 3.2 (3.1-3.4)    | 2.6 (2.5-2.7)    | 2000-2011            | -1.1*    | 2011-2015            | -6.4*    |
|                                         | yes      | 2.7 (2.5-2.8)                   | 2.6 (2.5-2.8)    | 2.6 (2.5-2.7)    | 2.0 (2.0-2.1)    | 2000-2009            | 0.9      | 2009-2015            | -5.6*    |
| Chronic pulmonary disease               | no       | 30.7 (30.1-31.3)                | 34.3 (33.7-34.9) | 33.1 (32.4-33.8) | 34.5 (34.2-34.8) | 2000-2004            | 2.7*     | 2004-2015            | 0.1      |
|                                         | yes      | 24 (23.4-24.5)                  | 30.9 (30.2-31.5) | 32.4 (31.7-33.1) | 32.3 (31.9-32.6) | 2000-2006            | 5.1*     | 2006-2015            | -0.0     |
| Peptic ulcer disease                    | no       | 1.7 (1.6-1.7)                   | 1.4 (1.3-1.5)    | 1.3 (1.2-1.3)    | 1.1 (1.1-1.2)    | 2000-2006            | -3.6*    | 2006-2015            | -1.5*    |
|                                         | yes      | 1.3 (1.3-1.4)                   | 1.1 (1-1.2)      | 1.0 (1.0-1.1)    | 0.8 (0.8-0.8)    | 2000-2012            | -3.0*    | 2012-2015            | -5.8*    |
| Rheumatic disease                       | no       | 2.8 (2.7-2.9)                   | 3.2 (3.1-3.3)    | 3.6 (3.5-3.7)    | 3.9 (3.8-3.9)    | 2000-2012            | 2.7*     | 2012-2015            | 0.4      |
|                                         | yes      | 1.8 (1.7-1.9)                   | 2.1 (2.1-2.2)    | 2.6 (2.5-2.7)    | 2.7 (2.6-2.7)    | 2000-2011            | 3.9*     | 2011-2015            | -0.4     |
| Mild liver disease                      | no       | 2.7 (2.6-2.8)                   | 3.6 (3.4-3.7)    | 4.6 (4.3-4.8)    | 5.3 (5.2-5.5)    | 2000-2015            | 4.4*     | n/a                  |          |
|                                         | yes      | 2.2 (2.0-2.3)                   | 2.9 (2.8-3)      | 3.8 (3.6-4.0)    | 4.5 (4.4-4.6)    | 2000-2012            | 5.3*     | 2012-2015            | 2.1*     |
| Moderate or severe liver disease        | no       | 0.6 (0.6-0.7)                   | 0.8 (0.7-0.8)    | 1.3 (1.2-1.4)    | 1.5 (1.5-1.6)    | 2000-2015            | 7.1*     | n/a                  |          |
|                                         | yes      | 0.5 (0.5-0.5)                   | 0.6 (0.6-0.6)    | 0.9 (0.9-1.0)    | 1.1 (1.0-1.1)    | 2000-2011            | 7.2*     | 2011-2015            | 2.4      |
| Hemiplegia or paraplegia                | no       | 1.9 (1.8-1.9)                   | 1.9 (1.8-2)      | 2.8 (2.7-2.9)    | 2.9 (2.8-3.0)    | 2000-2015            | 3.5*     | n/a                  |          |
|                                         | yes      | 1.1 (1-1.1)                     | 1.1 (1.0-1.1)    | 1.6 (1.5-1.6)    | 1.6 (1.5-1.6)    | 2000-2015            | 3.0*     | n/a                  |          |
| Renal disease                           | no       | 5.1 (4.9-5.3)                   | 7.7 (7.5-8.0)    | 13.1 (12.7-13.4) | 15.2 (15.0-15.4) | 2000-2007            | 14.6*    | 2007-2015            | 3.6*     |
|                                         | yes      | 14.6 (14.1-15.1)                | 17.2 (16.7-17.8) | 27.9 (27.2-28.5) | 31.0 (30.7-31.3) | 2000-2009            | 8.6*     | 2009-2015            | 2.0      |

## SUPPLEMENTARY DATA

|                                               |     |               |               |                  |                  |           |       |           |       |
|-----------------------------------------------|-----|---------------|---------------|------------------|------------------|-----------|-------|-----------|-------|
| Malignancy, except malignant neoplasm of skin | no  | 9.0 (8.7-9.2) | 9.4 (9.0-9.7) | 10.6 (10.0-11.3) | 10.4 (10.1-10.7) | 2000-2015 | 1.3*  | n/a       |       |
|                                               | yes | 4.7 (4.5-4.8) | 5.2 (5.1-5.4) | 6.2 (5.9-6.5)    | 6.1 (5.9-6.2)    | 2000-2012 | 2.8*  | 2012-2015 | -1.7  |
| Metastatic solid tumour                       | no  | 4.1 (3.9-4.2) | 4.2 (4.1-4.4) | 4.6 (4.3-5.1)    | 4.4 (4.2-4.5)    | 2000-2015 | 0.8*  | n/a       |       |
|                                               | yes | 1.8 (1.7-1.9) | 2.0 (1.9-2.1) | 2.4 (2.2-2.5)    | 2.1 (2.0-2.2)    | 2000-2010 | 3.1*  | 2010-2015 | -2.4* |
| HIV/AIDS                                      | no  | 2.3 (1.9-2.8) | 2.0 (1.6-2.4) | 1.8 (1.4-2.2)    | 1.2 (1.1-1.3)    | 2000-2015 | -4.9* |           |       |
|                                               | yes | 0.4 (0.3-0.5) | 0.4 (0.3-0.5) | 0.5 (0.4-0.6)    | 0.4 (0.3-0.4)    | 2000-2008 | 2.1   | 2008-2015 | -4.9* |

<sup>a</sup>Data are reported as the proportions and 95%CI, unless otherwise stated <sup>b</sup>Indicates the year in which linear trends change in either direction or magnitude;; n/a no second trend identified; NA linear trend not assessed as data are not normally distributed. \*p<0.05; Data sources: AHRQ, the National Inpatient Sample

SUPPLEMENTARY DATA

**Supplementary Table 4.** Age-standardized rates of all hospitalizations with skin and soft tissue infections, by amputation\* and diabetes status, U.S. 2000-2015

|                                  | Hospitalization rate (per 1,000 people) (95%CI) |                     |                     |                     | Year      | Trend 1 |         | Trend 2   |         |         |
|----------------------------------|-------------------------------------------------|---------------------|---------------------|---------------------|-----------|---------|---------|-----------|---------|---------|
|                                  | 2000                                            | 2005                | 2010                | 2015                |           | Δ%/year | p-value | Year      | Δ%/year | p-value |
| <i>Diabetes</i>                  |                                                 |                     |                     |                     |           |         |         |           |         |         |
| Skin infection and amputation    | 5.14 (4.35-5.92)                                | 3.76 (3.15-4.38)    | 3.14 (2.63-3.64)    | 4.62 (4-5.24)       | 2000-2009 | -5.47   | <0.001  | 2009-2015 | 6.11    | <0.001  |
| Skin infection and no amputation | 27.41 (25.9-28.93)                              | 28.09 (26.69-29.48) | 26.29 (25.12-27.46) | 32.14 (30.94-33.34) | 2000-2015 | 0.41    | 0.25    | n/a       |         |         |
| <i>No diabetes</i>               |                                                 |                     |                     |                     |           |         |         |           |         |         |
| Skin infection and amputation    | 0.2 (0.16-0.24)                                 | 0.17 (0.13-0.2)     | 0.15 (0.11-0.19)    | 0.15 (0.11-0.18)    | 2000-2013 | -3.24   | <0.001  | 2013-2015 | 4.4     | 0.3     |
| Skin infection and no amputation | 3.68 (3.56-3.81)                                | 4.65 (4.5-4.79)     | 4.92 (4.77-5.06)    | 4.66 (4.55-4.77)    | 2000-2006 | 4.73    | <0.001  | 2006-2015 | -0.58   | <0.05   |

n/a no second trend identified; \*amputation was defined as non-traumatic lower limb extremity, ICD-9-CM codes: 84.1
